# Supplementary material
Source: PubMed Central journal article supplement (PMC4209364)
Supplement: 97320630010562S1.pdf [file 97320630010562S1.pdf]

## Supplementary material:

**Table 1:** Docking result of fisetin against three targets of AD using FlexX and iGEMDOCK.

| Docking result of fisetin against three targets of AD using FlexX |                    |          |          |         |         |        |        | Docking result of fisetin against three targets of AD using iGEMDOCK |          |          |      |                                                                                                                        |
|-------------------------------------------------------------------|--------------------|----------|----------|---------|---------|--------|--------|----------------------------------------------------------------------|----------|----------|------|------------------------------------------------------------------------------------------------------------------------|
| Sl No                                                             | Name of the Target | Score    | Match    | Lipo    | Ambig   | Clash  | Rot    | Energy                                                               | vdW      | H-Bond   | Elec | Interacting residues                                                                                                   |
| 1.                                                                | AChE (1EVE)        | -28.2652 | -27.0709 | -8.3948 | -8.8656 | 5.0661 | 5.6000 | -112.042                                                             | -86.8547 | -25.1877 | 0    | GLN-69, TYR-70, ASP-72, TRP-84, ASN-85, TYR-130, SER-200, HIS-440, TRP-84, TRP-84, GLY-117, GLY-118, TYR-121, SER-122. |
| 2.                                                                | ABAD (ISO8)        | -15.0147 | -20.0799 | -4.2368 | -5.3236 | 3.5356 | 5.6000 | -103.006                                                             | -80.7207 | -22.2853 | 0    | SER-20, LEU-22, GLY-2, ALA-63, VAL-65, GLY-93, GLY-17, ASP-41, LEU-42, VAL-65, ALA-92, ILE-94.                         |
| 3.                                                                | BACE1 (2QP8)       | -31.4957 | -30.1429 | -8.9555 | -8.3419 | 3.5445 | 7.0000 | -70.9739                                                             | -42.0566 | -28.9173 | 0    | ARG-68, ASN-89, HIS-110, ARG-111, ARG-68, ASN-175, LEU-228.                                                            |

**Table 2:** ADMET predicted profile of fisetin.

| Model                                       | Result                         | Probability |
|---------------------------------------------|--------------------------------|-------------|
| <b>Absorption</b>                           |                                |             |
| Blood-Brain Barrier                         | BBB+                           | 0.5116      |
| Human Intestinal Absorption                 | HIA+                           | 0.9833      |
| Caco-2 Permeability                         | Caco2-                         | 0.8367      |
| P-glycoprotein Substrate                    | Substrate                      | 0.5510      |
| P-glycoprotein Inhibitor                    | Non-inhibitor                  | 0.9018      |
|                                             | Non-inhibitor                  | 0.8259      |
| Renal Organic Cation Transporter            | Non-inhibitor                  | 0.9242      |
| <b>Distribution</b>                         |                                |             |
| <b>Metabolism</b>                           |                                |             |
| CYP450 2C9 Substrate                        | Non-substrate                  | 0.8088      |
| CYP450 2D6 Substrate                        | Non-substrate                  | 0.9110      |
| CYP450 3A4 Substrate                        | Non-substrate                  | 0.6630      |
| CYP450 1A2 Inhibitor                        | Inhibitor                      | 0.9249      |
| CYP450 2C9 Inhibitor                        | Inhibitor                      | 0.8949      |
| CYP450 2D6 Inhibitor                        | Non-inhibitor                  | 0.9230      |
| CYP450 2C19 Inhibitor                       | Non-inhibitor                  | 0.6965      |
| CYP450 3A4 Inhibitor                        | Non-inhibitor                  | 0.7054      |
| CYP Inhibitory Promiscuity                  | Low CYP Inhibitory Promiscuity | 0.5409      |
| <b>Excretion</b>                            |                                |             |
| <b>Toxicity</b>                             |                                |             |
| Human Ether-a-go-go-Related Gene Inhibition | Weak inhibitor                 | 0.9774      |
|                                             | Non-inhibitor                  | 0.8374      |
| AMES Toxicity                               | Non AMES toxic                 | 0.5905      |
| Carcinogens                                 | Non-carcinogens                | 0.9390      |
| Fish Toxicity                               | High FHMT                      | 0.9766      |
| TetrahymenaPyriformis Toxicity              | High TPT                       | 0.9971      |
| Honey Bee Toxicity                          | High HBT                       | 0.6228      |
| Biodegradation                              | Not ready biodegradable        | 0.8902      |
| Acute Oral Toxicity                         | II                             | 0.7187      |
| Carcinogenicity (Three-class)               | Non-required                   | 0.5926      |

**Table 3:** ADMET predicted profile of fisetin based on regression analysis.

| Model                          | Value   | Unit          |
|--------------------------------|---------|---------------|
| <b>Absorption</b>              |         |               |
| Aqueous solubility             | -3.0804 | LogS          |
| Caco-2 Permeability            | 0.4029  | LogPapp, cm/s |
| <b>Distribution</b>            |         |               |
| <b>Metabolism</b>              |         |               |
| <b>Excretion</b>               |         |               |
| <b>Toxicity</b>                |         |               |
| Rat Acute Toxicity             | 3.1831  | LD50, mol/kg  |
| Fish Toxicity                  | 0.2432  | pLC50, mg/L   |
| TetrahymenaPyriformis Toxicity | 0.5944  | pIGC50, ug/L  |
